# Supplementary material
Source: Royal Society of Chemistry journal article supplement (doi:10.1039/d6fo00790b)

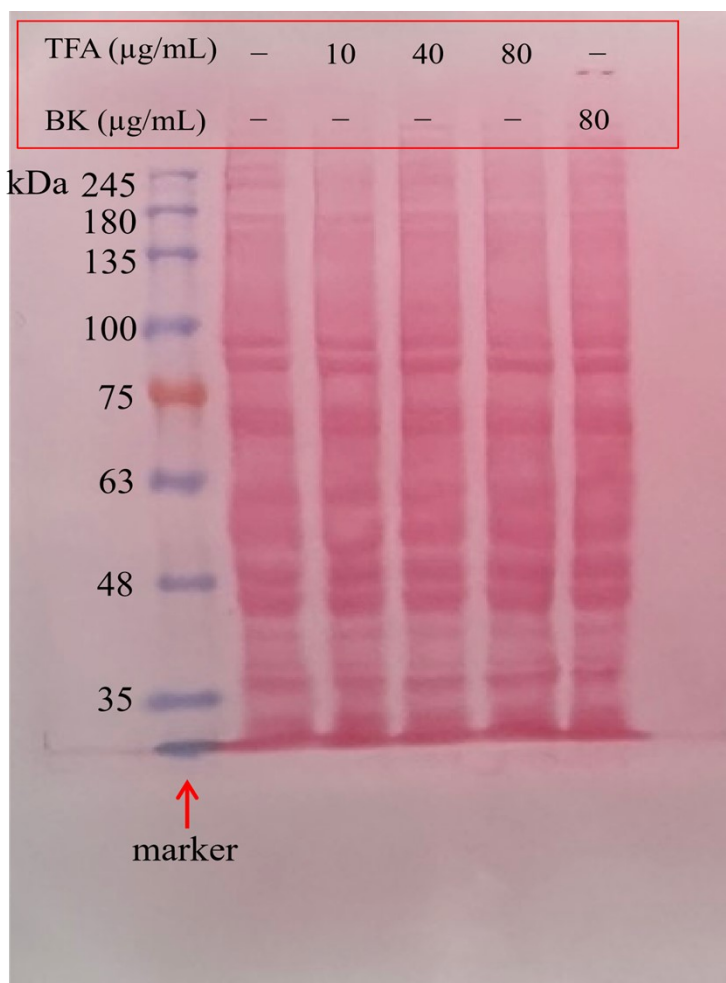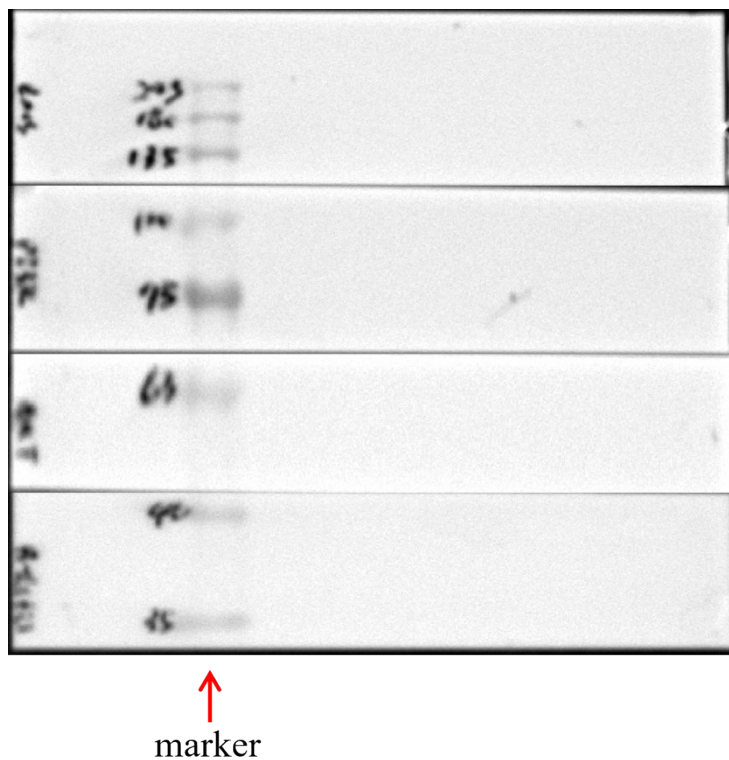

|                          |   |    |    |    |    |
|--------------------------|---|----|----|----|----|
| TFA ( $\mu\text{g/mL}$ ) | - | 10 | 40 | 80 | -  |
| BK ( $\mu\text{g/mL}$ )  | - | -  | -  | -  | 80 |

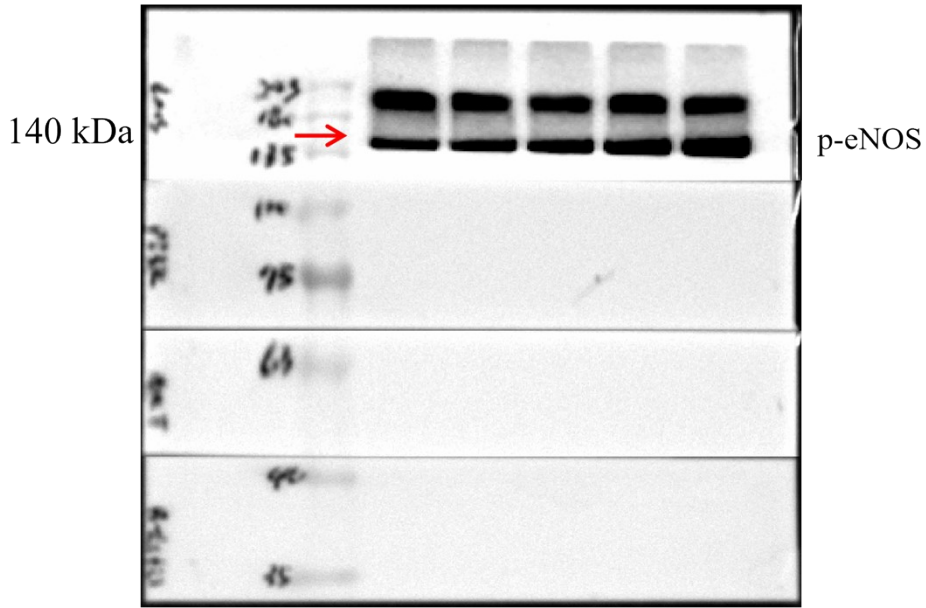

|                          |   |    |    |    |    |
|--------------------------|---|----|----|----|----|
| TFA ( $\mu\text{g/mL}$ ) | - | 10 | 40 | 80 | -  |
| BK ( $\mu\text{g/mL}$ )  | - | -  | -  | -  | 80 |

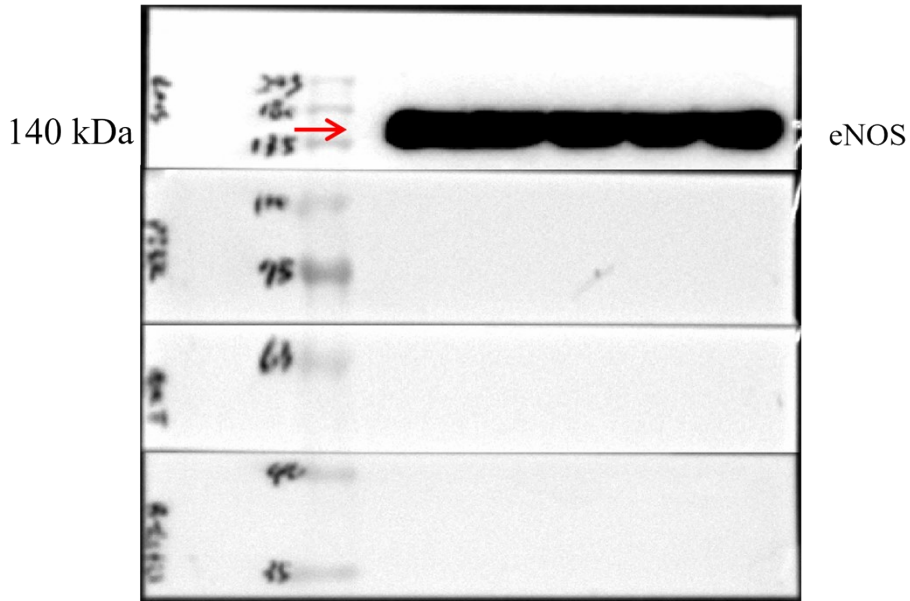

|                          |   |    |    |    |    |
|--------------------------|---|----|----|----|----|
| TFA ( $\mu\text{g/mL}$ ) | - | 10 | 40 | 80 | -  |
| BK ( $\mu\text{g/mL}$ )  | - | -  | -  | -  | 80 |

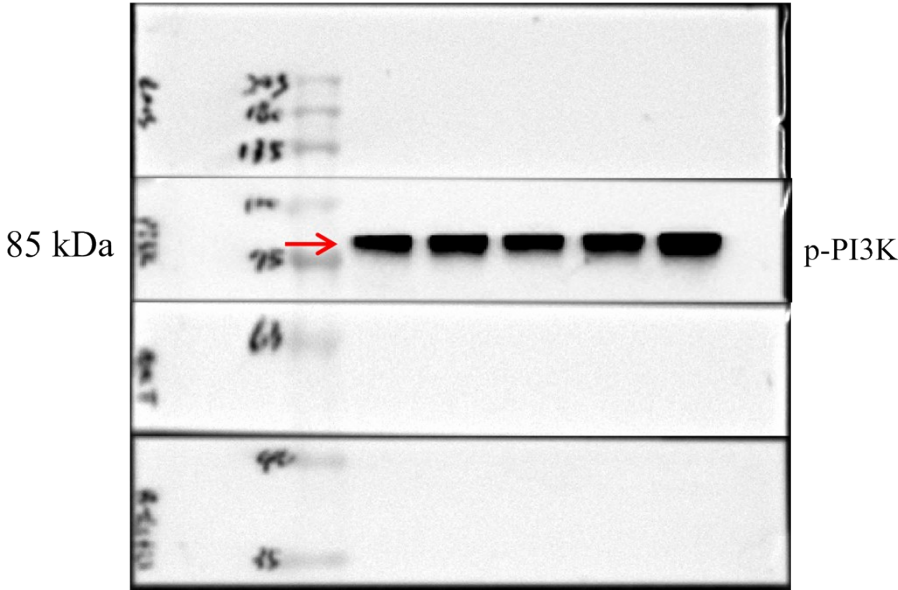

|                          |   |    |    |    |    |
|--------------------------|---|----|----|----|----|
| TFA ( $\mu\text{g/mL}$ ) | - | 10 | 40 | 80 | -  |
| BK ( $\mu\text{g/mL}$ )  | - | -  | -  | -  | 80 |

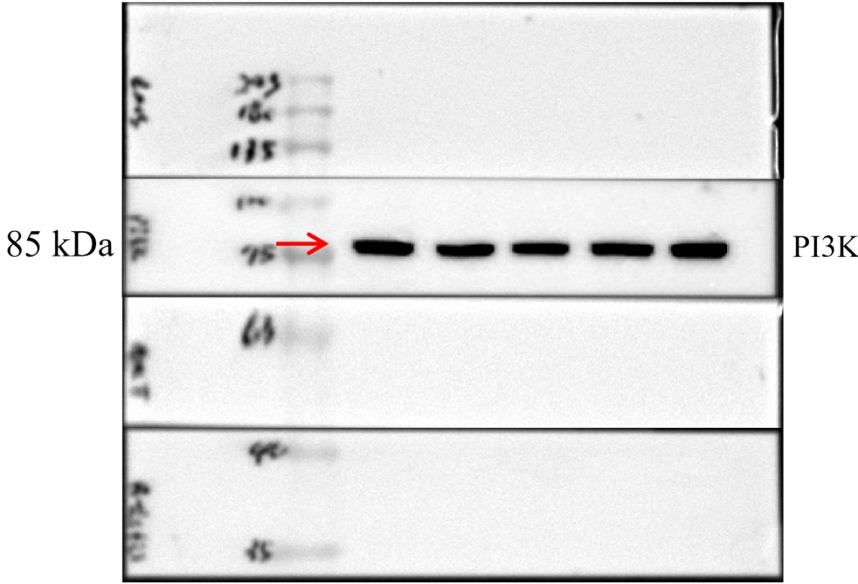

|                          |   |    |    |    |    |
|--------------------------|---|----|----|----|----|
| TFA ( $\mu\text{g/mL}$ ) | - | 10 | 40 | 80 | -  |
| BK ( $\mu\text{g/mL}$ )  | - | -  | -  | -  | 80 |

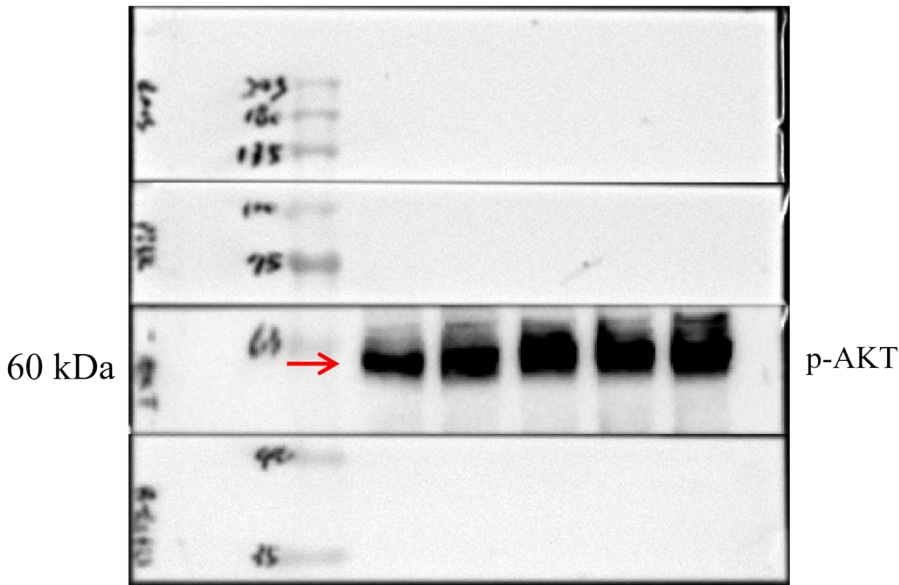

|                          |   |    |    |    |    |
|--------------------------|---|----|----|----|----|
| TFA ( $\mu\text{g/mL}$ ) | - | 10 | 40 | 80 | -  |
| BK ( $\mu\text{g/mL}$ )  | - | -  | -  | -  | 80 |

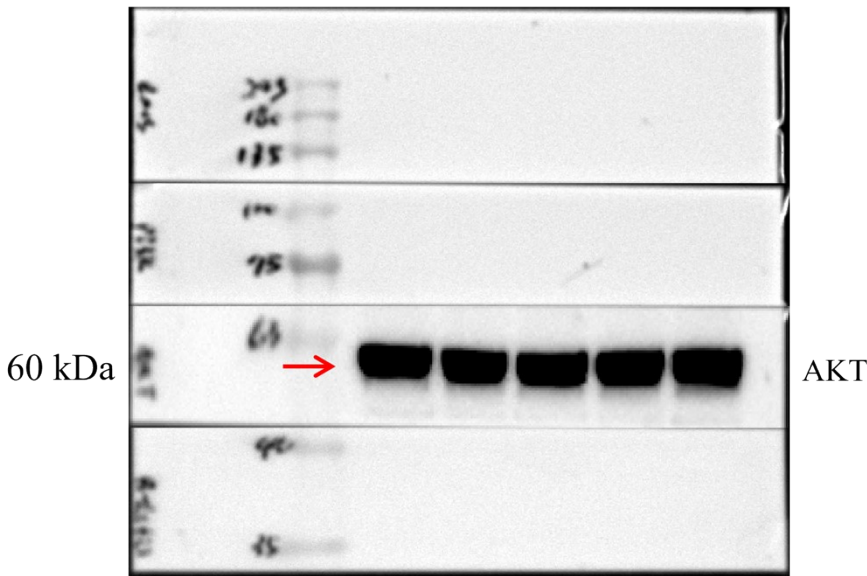

|                          |   |    |    |    |    |
|--------------------------|---|----|----|----|----|
| TFA ( $\mu\text{g/mL}$ ) | - | 10 | 40 | 80 | -  |
| BK ( $\mu\text{g/mL}$ )  | - | -  | -  | -  | 80 |

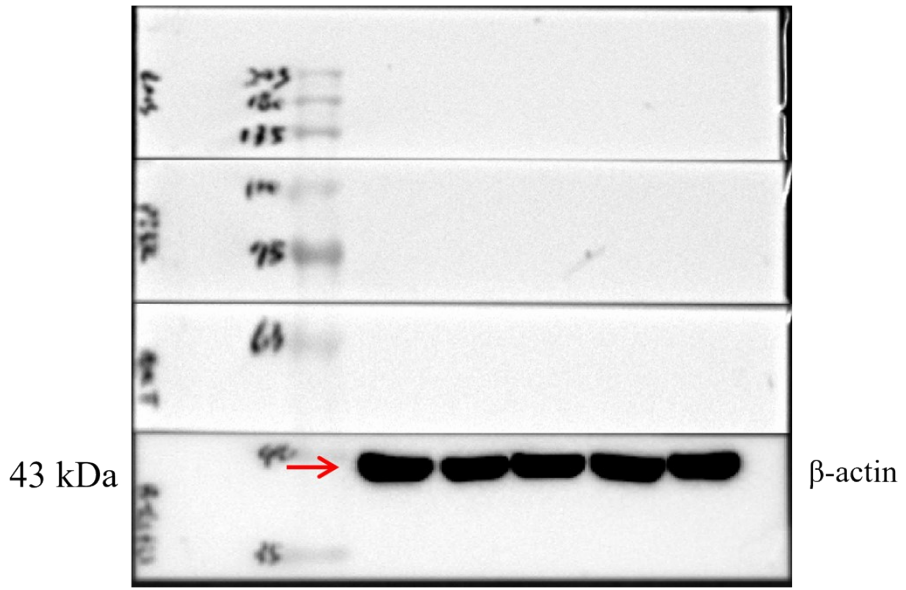

Supplement: d6fo00790b1.pdf [file d6fo00790b1.pdf]
